# Supplementary material
Source: publisher figshare collection journal article supplement (https://gsapubs.figshare.com/ndownloader/files/23300162)
Supplement: Supplementary file 1 [file 23300162]

Grenville basement structure associated with the Eastern Tennessee seismic zone, southeastern USA

Christine A. Powell and William A. Thomas

---

Table DR1. Acceptable rock types for the depth interval 4-20 km

| Region                                | Vp (km/s)              | Vs (km/s)    | Bouguer gravity | Magnetic anomaly | Rock types                            |
|---------------------------------------|------------------------|--------------|-----------------|------------------|---------------------------------------|
| 1. mafic intrusion                    | 6.58                   | 3.73         | very high       | very high        | diorite, gabbro                       |
| 2. anorthosite                        | 6.91                   | 3.73 max     | medium          | very low         | anorthosite                           |
| 3. fault zone                         | 6.17                   | 3.50         | low             | very high        | cataclasite mylonite with mafic flows |
| 4. reactivated sheared basement rocks | 6.31 (NE)<br>6.54 (SW) | 3.68<br>3.74 | low<br>medium   | low<br>low       | Felsic-mafic granulite                |
| 5. Blue Ridge Grenville basement      | 6.11                   | ≥ 3.4        | very low        | medium           | Granite gneiss                        |
